# Supplementary material for: Encapsulation of dual cytotoxic and anti-angiogenic gold(iii) complexes by gelatin-acacia microcapsules: In vitro and in vivo studies
Source: Royal Society of Chemistry journal article supplement (doi:10.1039/c003044a), 2010-01-01
Supplement: c003044a.pdf [file c003044a.pdf]

**Electronic Supplementary Information**  
**for**  
**“Encapsulation of dual cytotoxic and anti-angiogenic gold(III) complexes by gelatin-acacia microcapsules: In vitro and in vivo studies”**

Jessie Jing Yan,<sup>a</sup> Raymond Wai-Yin Sun,<sup>a</sup> Peng Wu,<sup>a</sup> Marie C. M. Lin,<sup>a</sup> Albert S.-C. Chan<sup>b</sup> and  
Chi-Ming Che<sup>\*a</sup>

<sup>a</sup> Department of Chemistry and Open Laboratory of Chemical Biology of the Institute of Molecular Technology for Drug Discovery and Synthesis, The University of Hong Kong, Pokfulam Road, Hong Kong, China. Fax: +852 28571586; E-mail: [cmche@hku.hk](mailto:cmche@hku.hk)

<sup>b</sup> Department of Applied Biology and Chemical Technology, Institute of Textiles and Clothing, Hong Kong Polytechnic University, Hong Kong, China.

Fax: (+852) 2857-1586; E-mail: [cmche@hku.hk](mailto:cmche@hku.hk)

**Figures and Tables**

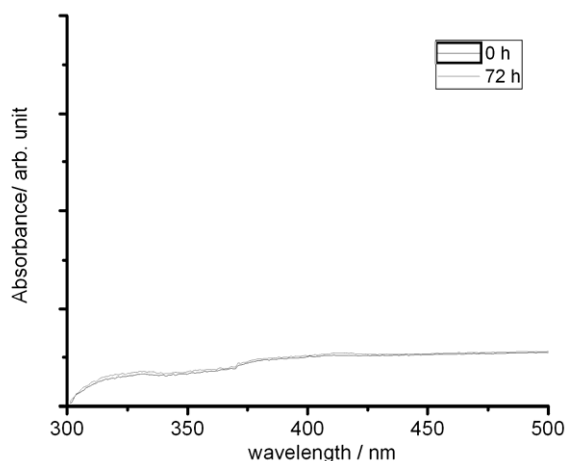

Fig. S1. UV-visible absorption spectra of **1a-GA1** in PBS containing GSH (2 mM) at time = 0 and 72 h.

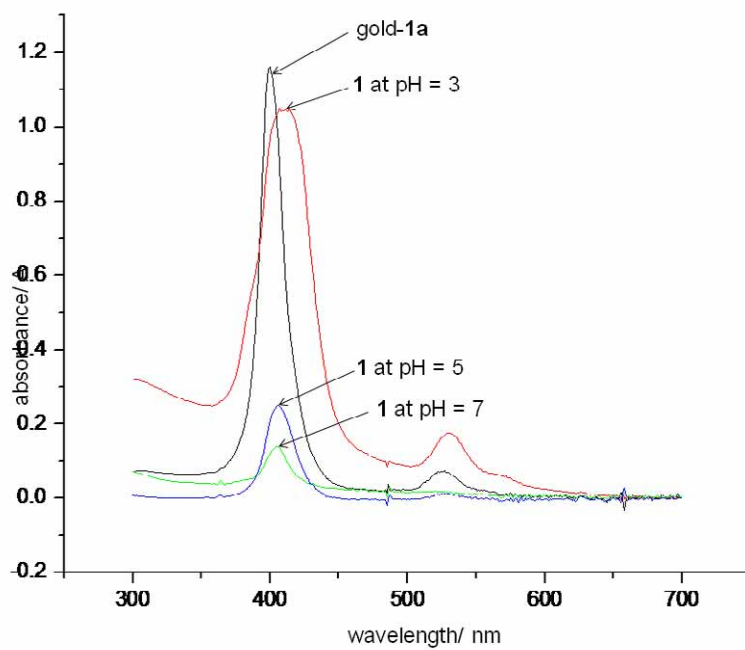

Fig. S2. UV-visible absorption spectrum of **1a**-GA1 at different pH.

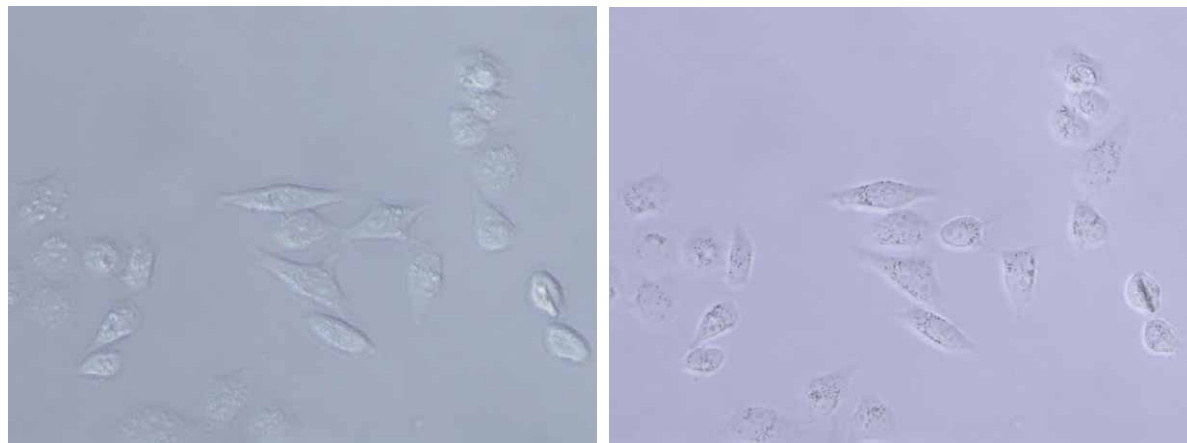

Fig. S3. HeLa cell treated with gold-**1a** ( $1 \mu\text{M}$ ) for 0 (left) and 1 h (right)

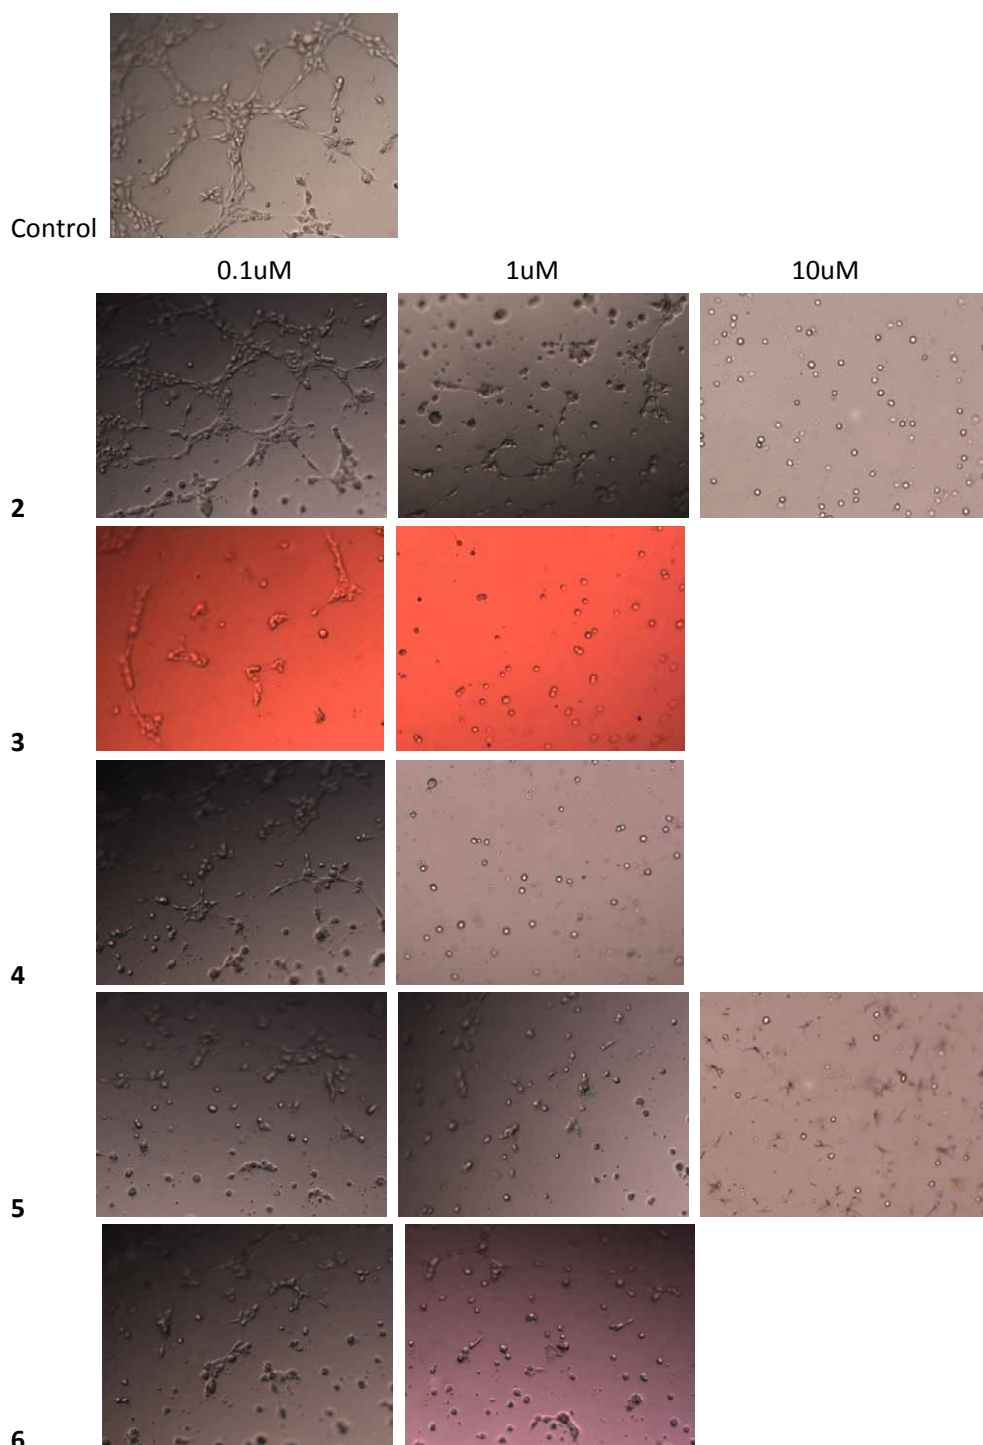

7

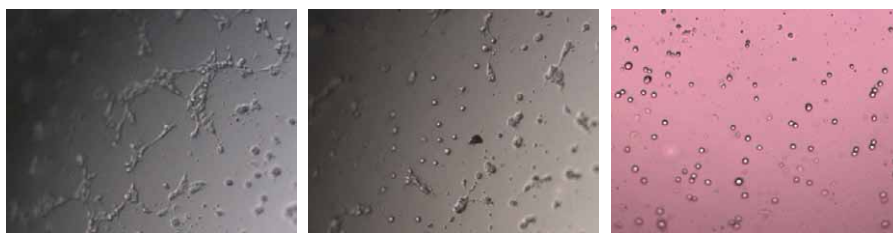

Fig. S4. Anti-angiogenic properties of complexes **2** – **7**.

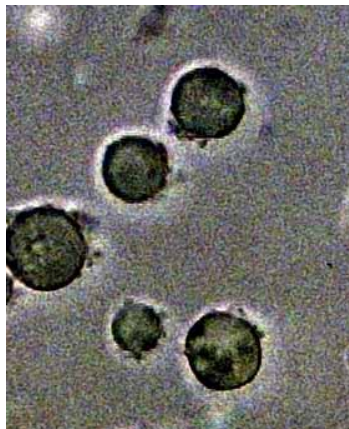

Fig. S5. Photograph of the microcapsules **2-GA**.

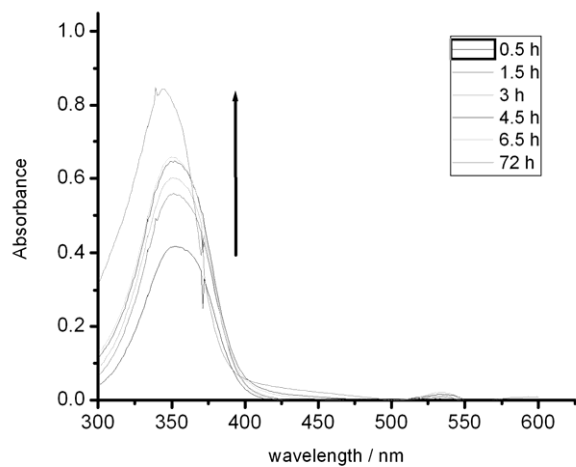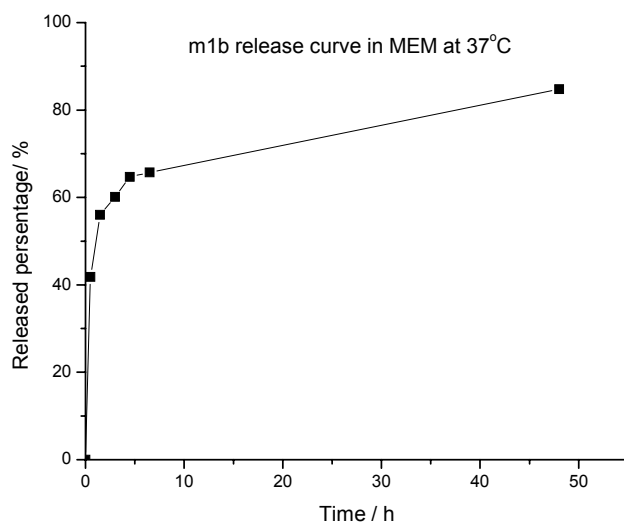

Fig. S6. Sustained-release property of 2-GA in MEM medium.

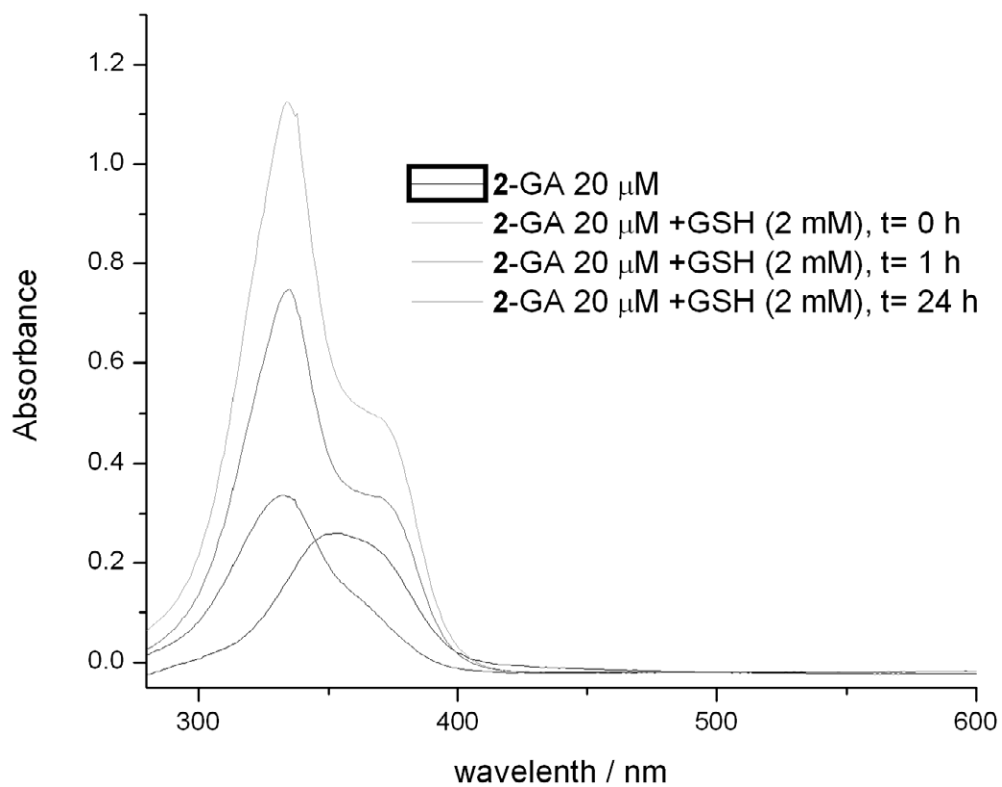

Fig S7. UV-visible spectral changes of 2-GA in PBS solution in the presence of GSH (2 mM).
